# Supplementary material
Source: Springer Nature journal article supplement (https://www.springermedizin.de/resource/supplementary/12890_2014_627_MOESM3_ESM.pdf/9505444)

**A**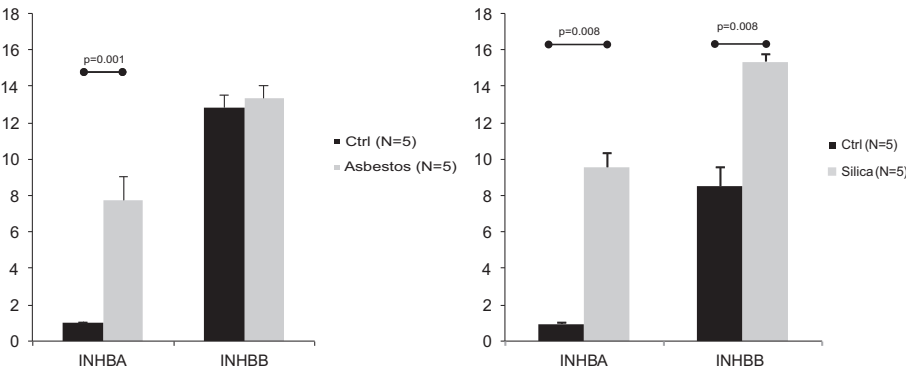**B**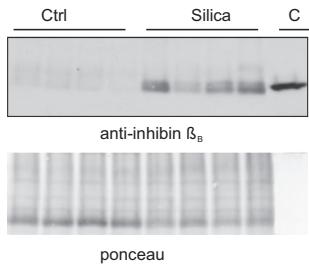**C**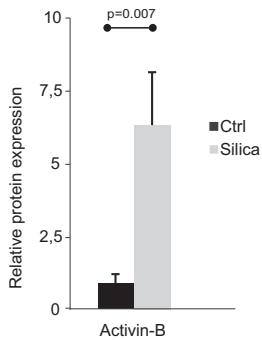

Supplement: MOESM3 [file 9505444]
